# Supplementary material for: A Complex Containing SNF1-Related Kinase (SnRK1) and Adenosine Kinase in Arabidopsis
Source: PubMed Central journal article supplement (PMC3907550; doi:10.1371/journal.pone.0087592), 2014-01-30
Supplement: pone.0087592.s005.pdf [file pone.0087592.s005.pdf]

**Table S2. ADK proteins from diverse eukaryotes contain conserved potential SNF1/AMPK/SnRK1 phosphorylation sites**

| Species                            | % Identity,<br>entire protein | T68                 | T105                | S175                | S196                |
|------------------------------------|-------------------------------|---------------------|---------------------|---------------------|---------------------|
| <i>Arabidopsis thaliana</i> (ADK2) | 100                           | IAGGAT <u>Q</u> NSI | MKKDA <u>T</u> AAGV | FFLTV <u>S</u> PESI | FTMNL <u>S</u> APFI |
| <i>Arabidopsis thaliana</i> (ADK1) | 92                            | IAGGAT <u>Q</u> NSI | MKKDA <u>T</u> AAGV | FFLTV <u>S</u> PESI | FTMNL <u>S</u> APFI |
| <i>Vitis vinifera</i>              | 86                            | IAGGAT <u>Q</u> NSI | -                   | FFLTV <u>S</u> PESI | FMMNL <u>S</u> APFI |
| <i>Populus trichocarpa</i>         | 86                            | IAGGAT <u>Q</u> NSI | MKKNS <u>T</u> EAGV | FFLTV <u>S</u> PESI | FTMNL <u>S</u> APFI |
| <i>Solanum tuberosum</i>           | 85                            | IAGGAT <u>Q</u> NSI | -                   | FFLTV <u>S</u> PESI | FMMNL <u>S</u> APFI |
| <i>Nicotiana tabacum</i>           | 86                            | IAGGAT <u>Q</u> NSI | -                   | FFLTV <u>S</u> PESI | FMMNL <u>S</u> APFI |
| <i>Gossypium hirsutum</i>          | 85                            | IAGGAT <u>Q</u> NSI | -                   | FFLTV <u>S</u> PESI | FMMNL <u>S</u> APFI |
| <i>Sorghum bicolor</i>             | 82                            | IAGGAT <u>Q</u> NSI | -                   | FFLTV <u>S</u> PDSI | FMMNL <u>S</u> APFI |
| <i>Oryza sativa</i>                | 82                            | IAGGAT <u>Q</u> NSI | -                   | FFLTV <u>S</u> PDSI | FLMNL <u>S</u> APFI |
| <i>Glycine max</i>                 | 81                            | IAGGAT <u>Q</u> NSI | -                   | FFLTV <u>S</u> PDSI | FMMNL <u>S</u> APFI |
| <i>Zea mays</i>                    | 82                            | IAGGAT <u>Q</u> NSI | -                   | FFLTV <u>S</u> PDSI | FLMNL <u>S</u> APFI |
| <i>Physcomitrella patens</i>       | 67                            | IAGGAT <u>Q</u> NTI | MFKLA <u>S</u> EGGV | FFLTV <u>S</u> PESM | FMMNL <u>S</u> ASFV |
| <i>Chlamydomonas reinhardtii</i>   | 53                            | -                   | MTEVA <u>T</u> AEGV | FFITV <u>S</u> PASI | -                   |
| <i>Mus musculus</i>                | 57                            | -                   | -                   | FFLTV <u>S</u> PESV | FTLNL <u>S</u> APFI |
| <i>Danio rerio</i>                 | 59                            | -                   | -                   | FFLTV <u>S</u> LESI | FCLNL <u>S</u> APFI |
| <i>Rattus norvegicus</i>           | 57                            | -                   | -                   | FTMNL <u>S</u> APFV | FTLNL <u>S</u> APFI |
| <i>Macaca mulatta</i>              | 56                            | -                   | -                   | FFLTV <u>S</u> PESV | FTLNL <u>S</u> APFI |
| <i>Homo sapiens</i>                | 56                            | -                   | -                   | FFLTV <u>S</u> PESV | FTLNL <u>S</u> APFI |
| <i>Saccharomyces cerevisiae</i>    | 40                            | -                   | -                   | FHLT <u>V</u> SPDAI | FVLNF <u>S</u> APFI |

ADK proteins from diverse eukaryotes contain conserved potential SnRK1 phosphorylation sites. ADK protein sequences were compared to determine the extent of conservation at sites corresponding to T68, T105, S175, and S196 in *Arabidopsis* ADK1 and ADK2. Amino acids shown in red are critical for SnRK1 recognition, and serine/threonine residues underlined are predicted to be phosphorylated by SnRK1. A hyphen (-) indicates the site is not conserved.
