# Supplementary material for: A Complex Containing SNF1-Related Kinase (SnRK1) and Adenosine Kinase in Arabidopsis
Source: PubMed Central journal article supplement (PMC3907550; doi:10.1371/journal.pone.0087592), 2014-01-30
Supplement: pone.0087592.s006.pdf [file pone.0087592.s006.pdf]

**Table S3. Phosphorylation of ADK and GST-SAMS by SnRK1-KD expressed in *N. benthamiana***

| SnRK1-KD or SnRK1-KD-K49R* (ng) | Substrate | SnRK1 activity |
|---------------------------------|-----------|----------------|
| 10                              | auto†     | 235904         |
| 30*                             | auto†     | 23421          |
| 10                              | auto      | 22631          |
| 10                              | ADK       | 84421          |
| 30*                             | ADK       | 34076          |
| 10                              | GST-SAMS  | 261765         |
| 30*                             | GST-SAMS  | 15157          |

† Not pre-incubated with unlabeled ATP

Activity values (in arbitrary units) were obtained by measuring signal intensity of <sup>32</sup>P-labeled SnRK1-KD (10 ng) or SnRK1-KD-K49R (30 ng) from PAGE gels exposed to a phosphorimager (autophosphorylation, Figure 5A). Activity values are also included for SnRK1-KD pre-incubated with cold ATP (autophosphorylation), and pre-incubated SnRK1-KD (10 ng) or SnRK1-KD-K49R (30 ng) + ADK in the presence of <sup>32</sup>P-ATP (Figure 5B). Images used for GST-SAMS incubated with the same SnRK1-KD (10 ng) or SnRK-KD-K49R (30 ng) preparations and <sup>32</sup>P-ATP are shown in Figure 1C.
