# Supplementary material for: A Complex Containing SNF1-Related Kinase (SnRK1) and Adenosine Kinase in Arabidopsis
Source: PubMed Central journal article supplement (PMC3907550; doi:10.1371/journal.pone.0087592), 2014-01-30
Supplement: pone.0087592.s007.pdf [file pone.0087592.s007.pdf]

**Table S.4A. ADK activity in the presence of HA<sub>2</sub>-His<sub>6</sub>-SnRK1-KD/K49R expressed in *N. benthamiana***

|                  | ADK activity | Fold change over (ADK+GFP) Mean±SE | Students t-test values relative to ADK+GFP | Students t-test values relative to ADK+SnRK1-KD |
|------------------|--------------|------------------------------------|--------------------------------------------|-------------------------------------------------|
| ADK              | 154461       | 0.480±0.050                        | 0.0157                                     | -                                               |
| ADK+GFP          | 329790       | 1.000±0.109                        | -                                          | -                                               |
| ADK+APT1         | 264074       | 0.800±0.049                        | 0.2258                                     | -                                               |
| ADK+SnRK1-KD     | 2313884      | 6.917±0.255                        | 0.0013                                     | -                                               |
| ADK+SnRK1-KDK49R | 1906351      | 5.667±0.308                        | 0.0012                                     | 0.265                                           |

Activity of purified ADK was measured in the presence of HA<sub>2</sub>His<sub>6</sub>-SnRK1-KD, HA<sub>2</sub>His<sub>6</sub>-SnRK1-KDK49R (kinase inactive mutant), and additional control proteins expressed and partially purified from *N. benthamiana*. ADK activity values (in arbitrary units) were obtained by measuring signal intensity of <sup>32</sup>P-labeled reaction product (5'-AMP) from TLC plates exposed to a phosphor-imager. Data were obtained from three independent experiments with two replicates each, and are shown graphically in Figure 6A.

**Table S4B. ADK activity in the presence of GST-SnK1-KD/K49R expressed in *E. coli***

|                   | ADK activity | Fold change over (ADK+GST) Mean±SE | Students t-test values relative to ADK+GST | Students t-test values relative to ADK+SnRK1-KD |
|-------------------|--------------|------------------------------------|--------------------------------------------|-------------------------------------------------|
| ADK               | 350663       | 0.272±0.012                        | 6.07E-04                                   | -                                               |
| ADK+GST           | 1273509      | 1.000±0.088                        | -                                          | -                                               |
| ADK+SnRK1-KD      | 5936427      | 4.795±0.205                        | 1.47E-05                                   | -                                               |
| ADK+SnRK1-KD-K49R | 5494783      | 4.418±0.159                        | 1.15E-04                                   | 0.327                                           |

Activity of purified ADK was measured in the presence of GST-SnRK1-KD or GST-SnRK1-KDK49R (kinase inactive mutant) expressed and partially purified from *E. coli*. ADK activity values (in arbitrary units) were obtained by measuring signal intensity of <sup>32</sup>P-labeled reaction product (5'-AMP) from TLC plates exposed to a phosphor-imager. Data were obtained from three independent experiments with two replicates each, and are shown graphically in Figure 6B.

**Table S4C. Stimulation of ADK activity by SnRK1-KD**

| SnRK1-ADK ratio | ADK activity in the presence of:           |              | *Fold change in ADK activity:              |              |
|-----------------|--------------------------------------------|--------------|--------------------------------------------|--------------|
|                 | HA <sub>2</sub> His <sub>6</sub> -SnRK1-KD | GST-SnRK1-KD | HA <sub>2</sub> His <sub>6</sub> -SnRK1-KD | GST-SnRK1-KD |
| 0.00            | 663209                                     | 526345       | 0.55                                       | 0.37         |
| 0.02            | 989658                                     | 727428       | 0.82                                       | 0.51         |
| 0.10            | 2021005                                    | 1872595      | 1.68                                       | 1.32         |
| 0.20            | 3988985                                    | 4057378      | 3.32                                       | 2.86         |
| 0.60            | 8443371                                    | 5063884      | 7.03                                       | 3.57         |
| 1.50            | 10017662                                   | 6680336      | 8.34                                       | 4.71         |
| 4.00            | 9051365                                    | 6379880      | 7.53                                       | 4.50         |

Activity of purified ADK was measured in the presence of HA<sub>2</sub>His<sub>6</sub>-SnRK1-KD expressed in *N. benthamiana*, or GST-SnRK1-KD expressed in *E. coli*. ADK activity values (in arbitrary units) were obtained by measuring signal intensity of <sup>32</sup>P-labeled reaction product (5'-AMP) from TLC plates exposed to a phosphor-imager. Data were obtained from three independent experiments, and are shown graphically in Figure 6C.

\*For fold-change calculations, ADK activities were normalized to ADK + GFP or ADK + GST, as appropriate.
