# Supplementary material for: A Complex Containing SNF1-Related Kinase (SnRK1) and Adenosine Kinase in Arabidopsis
Source: PubMed Central journal article supplement (PMC3907550; doi:10.1371/journal.pone.0087592), 2014-01-30
Supplement: pone.0087592.s008.pdf [file pone.0087592.s008.pdf]

**Table S5. Activity of SnRK1-KD expressed in *E. coli* and *N. benthamiana***

|                                            | Substrate | SnRK1 activity |
|--------------------------------------------|-----------|----------------|
| GST-SnRK1-KD*                              | auto      | 2290           |
| HA <sub>2</sub> His <sub>6</sub> -SnRK1-KD | auto      | 750709         |
| GST-SnRK1-KD*                              | GST-SAMS  | 4211           |
| HA <sub>2</sub> His <sub>6</sub> -SnRK1-KD | GST-SAMS  | 1022329        |

HA<sub>2</sub>His<sub>6</sub>-SnRK1-KD was expressed and partially purified from *N. benthamiana*, while GST-SnRK1-KD\* was expressed and partially purified from *E. coli*. Activity values (arbitrary units) were obtained by measuring signal intensity of <sup>32</sup>P-labeled SnRK1-KD (autophosphorylation) or GST-SAMS from images obtained by exposing PAGE gels to a phosphorimager (Figure S2). Exposures were for 5 h in the case of HA<sub>2</sub>His<sub>6</sub>-SnRK1-KD, and 72 h for GST-SnRK1-KD\*.
